# Supplementary material
Source: PubMed Central journal article supplement (PMC4253560)
Supplement: NIHMS631841-supplement-4.pdf [file NIHMS631841-supplement-4.pdf]

Table S1

| Gene Name         | DNA Binding Domain Similarity to Human                           | % Identity | Sx/Asx Fold Change |
|-------------------|------------------------------------------------------------------|------------|--------------------|
| <i>nhr-1</i>      | steroid hormone receptor ERR1 isoform 2; RXRA                    | 52.9; 55.1 | 23.26**            |
| <i>nhr-2</i>      | steroid hormone receptor ERR1 isoform 2; ROR-alpha isoform d     | 45.6; 53.6 | 6.80**             |
| <i>nhr-3</i>      | retinoid X receptor alpha; retinoid-related orphan receptor beta | 42.6; 53.6 | 2.82**             |
| <i>nhr-4</i>      | NR2E1 isoform a                                                  | 71.8       | 2.58*              |
| <i>nhr-5</i>      | NR2E1 isoform a                                                  | 71.0       | 1.28               |
| <i>nhr-6</i>      | NR5A2 isoform 1; ROR-alpha isoform c                             | 45.6; 50.7 | 1.27               |
| <i>nhr-7</i>      | RXRA                                                             | 58.8       | 1.27               |
| <i>nhr-8/HNF4</i> | hepatocyte nuclear factor 4-alpha                                | 73.9       | 1.20               |
| <i>nhr-9</i>      | FTZ-F1 related protein                                           | 60.3       | 1.17               |
| <i>nhr-10</i>     | NR1D1                                                            | 60.0       | 1.13               |
| <i>nhr-11</i>     | NR113 isoform 1                                                  | 53.6       | 1.12               |
| <i>nhr-12</i>     | liver X receptor alpha                                           | 60.3       | 0.98               |
| <i>nhr-13</i>     | NR5A2 isoform 1                                                  | 69.1       | 0.97               |
| <i>nhr-14</i>     | thyroid hormone receptor                                         | 66.2       | 0.95               |
| <i>nhr-15</i>     | retinoic acid receptor gamma isoform X1                          | 58.8       | 0.92               |
| <i>nhr-16</i>     | RXRA                                                             | 66.2       | 0.88               |
| <i>nhr-17</i>     | NR4A1 isoform 1                                                  | 72.5       | 0.83               |
| <i>nhr-18</i>     | photoreceptor-specific nuclear receptor isoform a                | 82.6       | 0.81               |
| <i>nhr-19</i>     | NR2C1 isoform X3                                                 | 66.2       | 0.78*              |
| <i>nhr-20/TLX</i> | NR4A3 isoform b                                                  | 85.5       | 0.77*              |
| <i>nhr-21</i>     | NR2E1 isoform a                                                  | 71.8       | 0.76*              |
| <i>nhr-22</i>     | NR113 isoform 6                                                  | 52.2       | 0.64*              |
| <i>nhr-23</i>     | COUP-transcription factor I                                      | 85.5       | 0.51**             |
