# Supplementary material
Source: PubMed Central journal article supplement (PMC4253560)

Figure S1

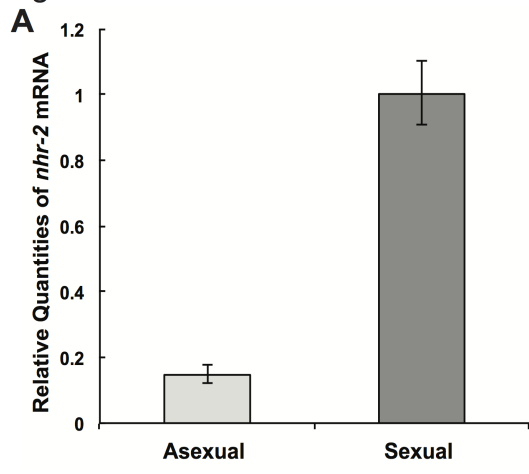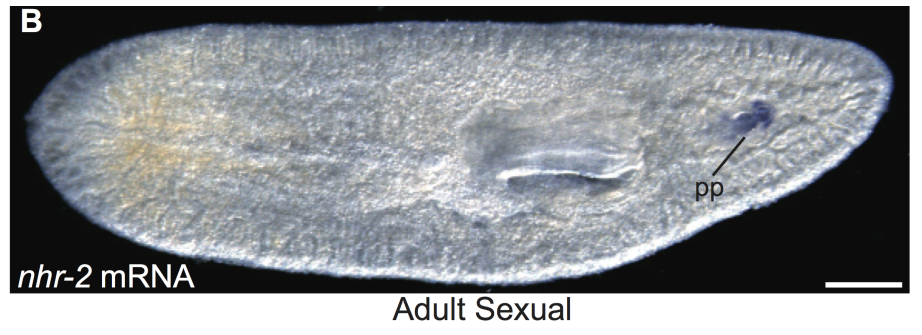

Supplement: NIHMS631841-supplement-1.pdf [file NIHMS631841-supplement-1.pdf]

Figure S2

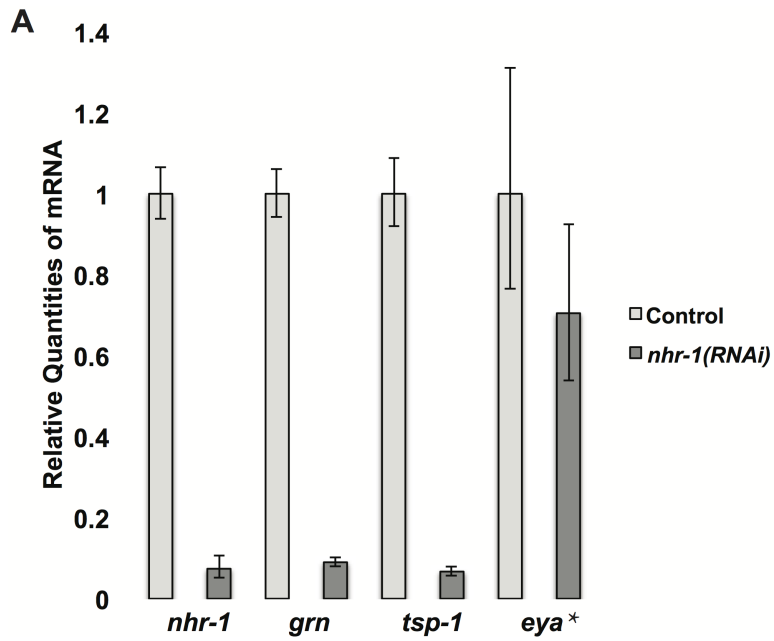

\**eya* not solely expressed in oviducts

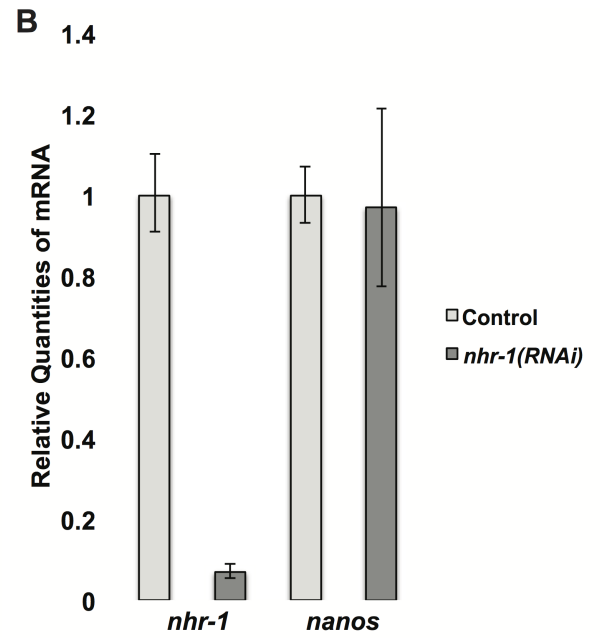

Supplement: NIHMS631841-supplement-2.pdf [file NIHMS631841-supplement-2.pdf]
